# Supplementary material for: Positive Synergistic Effects of Quercetin and Rice Bran on Human Gut Microbiota Reduces Enterobacteriaceae Family Abundance and Elevates Propionate in a Bioreactor Model
Source: Front Microbiol. 2021 Sep 30;12:751225. doi: 10.3389/fmicb.2021.751225 (PMC8516403; doi:10.3389/fmicb.2021.751225)
Supplement: Supplementary Table 1 — List of all differentially abundant taxa in medium with quercetin (QC), medium with rice bran (RB) and medium with both quercetin and rice bran (QC + RB) compared to control. DESEq2 was used in shotgun metagenome sequences on day 21 for identification of differentially present taxa in the quercetin and rice bran supplemented media conditions when compared to control. [file Table_1.xlsx]

## Sheet: Table 1A
Supplementary Table 1A: Per sample reads obtained from shotgun metagenomic seqeuencing
taxon_name	21R01	21R02	21R03	21R04	21R05	21R06	21R07	21R08	21R09	21R10	21R11	21R12
unclassified	1063675	961207	942955	1179933	1155717	1150235	820796	806904	1010906	869596	752756	749155
unclassified	903031	802795	717812	939526	948257	965512	653530	669695	786930	697671	596346	597542
[Clostridium] clostridioforme	228018	457948	181649	182482	240468	473076	257677	83622	455199	294361	482566	585446
Alistipes onderdonkii	232495	289020	258888	209698	181277	158214	322319	371236	482980	488679	300984	148332
Escherichia coli	460204	301473	199519	246681	444025	356376	109242	124275	84454	148241	31509	30732
Flavonifractor plautii	269852	335101	450485	226449	229685	207131	50378	19608	60001	45421	24415	21027
Bacteroides thetaiotaomicron	62938	34553	76226	211913	79874	143745	137728	181516	209196	135173	91947	167031
[Clostridium] symbiosum	37223	44543	68814	92051	136295	101577	97685	136543	367022	49958	84863	46703
[Clostridium] citroniae	77596	91372	131180	93993	156378	175277	95755	34638	76323	52407	67543	99330
Phascolarctobacterium sp. CAG:207	69433	51006	103498	119233	97966	77014	110305	74677	131189	94097	89567	95236
Intestinimonas butyriciproducens	18628	25626	41131	22740	22529	21337	137257	69246	81906	123018	151297	111684
Veillonella parvula	1	4	4	14	4	4	335894	9046	202220	253939	1453	21714
butyrate-producing bacterium SS3/4	113101	38306	102039	78529	116814	93410	574	21517	906	74381	18370	36694
Parabacteroides distasonis	29142	24838	44960	84682	52652	46728	51080	46992	80988	29500	55527	62795
Bacteroides sp. D20	43991	62705	43259	68330	40348	55674	32744	32106	52304	37634	53245	50108
Bacteroides uniformis	44313	61007	42227	66276	40642	54675	32119	32261	51611	37309	52671	48506
Sutterella wadsworthensis	29349	18800	44995	35078	38427	24798	50360	54415	80500	53769	57467	61951
[Clostridium] bolteae	21370	20869	30953	83612	16467	26479	11875	172241	23907	19760	38549	23710
Parabacteroides merdae	17381	10107	29035	73742	44459	54892	20710	32239	27829	18010	47635	33874
Blautia producta	51530	34030	36931	41675	54288	66440	24239	5715	21974	10466	4502	3308
[Clostridium] scindens	19036	28816	45345	46237	37207	33597	7241	8976	8616	8484	23792	35357
Bacteroides massiliensis	25042	3175	19587	50381	49003	25345	15636	25517	22131	6625	6005	6242
Megasphaera sp. NM10	53	50771	79	41478	77434	56634	105	91	168	98	175	193
Hungatella hathewayi	26225	18865	19700	38933	11464	24977	13049	12676	27324	7959	8267	8358
Desulfovibrio piger	128	91	191	130	186	111	208	40096	621	56385	21008	92294
Bacteroides xylanisolvens	56368	8727	56921	8823	11527	31776	4995	6108	7645	5579	3483	5475
Bacteroides ovatus	21631	4588	22899	22866	68936	18170	4046	5584	16495	9346	3808	5622
Bacteroides faecis	8382	5243	13582	18520	12330	21189	11574	14700	26430	19305	13541	23218
Clostridium sp. VE202-10	4600	4341	32180	15883	3994	7942	5553	29391	5408	4763	31566	8252
Bacteroides coprocola	7922	3827	9380	12829	12665	13334	9700	10959	14657	8647	7654	22322
Alistipes shahii	5968	5799	5606	17804	8368	4403	7299	8136	10559	10237	9278	5560
Oscillibacter sp. KLE 1728	9945	10566	37358	11536	10792	5732	2113	1065	2184	2070	2587	2315
Veillonella dispar	35	42	44	51	34	43	34352	1124	21371	26207	219	3227
Clostridiales bacterium VE202-28	5913	7473	5176	5010	5385	9828	6295	4214	10580	7586	8537	9820
Alistipes finegoldii	2792	2988	3021	3117	1920	1942	12999	12697	8359	12082	9295	11247
Dorea longicatena	14770	10792	14164	6580	2816	2441	4484	1207	6815	13055	2838	2428
[Clostridium] asparagiforme	6243	4994	7431	10175	9780	8010	4320	5170	6983	4193	5550	5519
Pseudoflavonifractor capillosus	6660	7007	13597	11947	9418	5456	3272	2112	3354	3406	2654	3042
Veillonella sp. oral taxon 158	5	14	1	26	16	13	28927	904	17504	21726	136	2524
Escherichia sp. TW09308	12365	8172	6953	6698	11757	9580	3023	3460	2336	4050	907	959
Alistipes sp. HGB5	2183	2312	2370	2251	1636	1502	11156	10985	6882	10057	7984	10001
Alistipes senegalensis	2835	3617	4906	3741	2664	3624	5340	5901	5412	12802	12345	4601
Dorea formicigenerans	4280	2159	6822	20169	10058	5390	594	1002	1225	1146	2246	2081
Clostridium sp. ATCC 29733	6788	2640	6840	4621	12343	10963	660	914	1575	976	1574	1697
Megasphaera elsdenii	51	6607	58	5699	20757	15938	83	69	94	95	89	129
Parabacteroides johnsonii	4669	3757	4000	8764	5119	8296	1778	3220	2712	1698	2143	2103
[Clostridium] saccharolyticum	4201	3379	4726	4279	4214	4640	2233	1814	4457	3700	2939	4374
Bacteroides fragilis	5940	1213	17298	3187	1576	2094	1614	2054	3045	1986	1712	1738
Veillonella sp. AS16	4	7	9	11	11	21	17441	417	9913	12458	83	1357
Coprococcus comes	2763	2127	3264	8779	10245	6845	509	367	580	1793	1228	1502
Faecalibacterium prausnitzii	3331	3588	4589	3897	5071	4763	2007	1246	2567	2533	2808	3317
Clostridiales bacterium 1_7_47FAA	3581	2186	2147	3267	2548	4303	2937	3383	5397	4093	2916	2487
Escherichia albertii	5669	3948	3144	3215	5667	4512	1375	1610	1068	1998	442	438
Bacteroides finegoldii	3925	1278	3841	3041	3289	3426	1533	2059	2758	1897	1627	2776
Bacteroides faecichinchillae	2392	1191	2370	3121	1981	2537	4135	3575	3651	1876	1788	2177
Bacteroides acidifaciens	3572	1119	4244	3593	2418	3630	1079	1275	2987	2430	1689	2336
Coprococcus catus	2925	706	6153	895	919	812	329	546	551	906	8948	5560
Oscillibacter sp. 1-3	3340	3663	6221	3985	3039	2698	1094	681	1108	1113	788	994
Bacteroides fluxus	2224	2449	2252	3663	1940	2570	1936	1737	2937	1861	2539	2281
Firmicutes bacterium ASF500	2331	3396	3142	3994	2343	1491	1157	837	1158	2640	1404	3741
Veillonella atypica	6	60	11	76	25	26	11060	726	6330	8088	63	985
Collinsella aerofaciens	4323	1674	2631	1759	2276	1875	51	264	3721	2600	3157	2761
Collinsella sp. 4_8_47FAA	4388	1646	2373	1842	2306	1968	19	253	3139	2510	3221	2677
Bacteroides caccae	2300	1060	2760	2752	2271	2915	1406	1752	2839	2124	1676	2345
Bacteroides intestinalis	1180	3621	1298	1765	1449	8994	892	996	1702	1238	1249	1299
[Clostridium] innocuum	1294	1676	5087	2052	1413	2507	4222	683	1565	901	1953	2096
Clostridiales bacterium VE202-08	6116	1005	3266	5915	3259	2974	224	114	208	218	161	1402
Eubacterium limosum	7471	963	7858	610	511	1521	225	4058	395	142	190	174
Agathobaculum desmolans	1627	2254	3869	3206	2739	2576	1862	503	2126	1510	788	915
[Ruminococcus] torques	1952	1707	2193	2939	2317	2894	1124	1124	1955	1697	1838	1965
Anaerostipes hadrus	235	178	316	954	926	304	702	145	156	179	8826	10584
Blautia obeum	2006	2006	2372	2850	2272	2487	1132	840	1842	1647	1677	1830
Anaerostipes caccae	1711	3195	1785	753	528	659	1787	2570	5120	2501	840	1511
Clostridium sp. KLE 1755	1617	1134	2604	2310	2408	1675	1254	1647	3441	1371	1223	1033
[Desulfotomaculum] guttoideum	1405	2134	1585	2040	1625	2827	1322	706	2133	1254	2037	2344
Parabacteroides sp. ASF519	1268	838	1936	3130	2061	2487	1130	1389	2239	1516	1518	1868
Bacteroides cellulosilyticus	1591	1484	2073	2348	1978	2564	1088	1103	2163	1537	1641	1781
Bacteroides vulgatus	2786	1060	3007	2038	1432	2422	824	1888	1634	1185	1145	1611
Dialister succinatiphilus	560	1130	601	2799	886	985	2011	1853	3770	1675	1938	2370
Fusobacterium nucleatum	215	151	277	173	166	141	102	100	18201	171	134	195
Alistipes timonensis	1063	1267	1351	1909	1093	989	1614	1866	2072	2916	2494	1305
Clostridiales bacterium VE202-21	2353	1814	2127	1780	1815	2433	680	1303	1328	1090	1472	1442
Anaerotruncus colihominis	2487	2785	3898	2343	2173	1877	711	422	724	744	623	629
Bacteroides gallinarum	1253	962	1653	3074	1909	1787	904	1151	1630	1193	1964	1559
Bacteroides stercorirosoris	1463	1328	1785	2097	1372	2031	1023	1127	1905	1349	1449	1694
Lachnospiraceae bacterium 3_1_57FAA_CT1	1330	1692	1428	1823	1451	1955	922	684	1535	1320	1522	2110
Bacteroides dorei	849	634	1228	2097	1354	2074	1775	1356	1738	1185	1828	1610
Prevotella stercorea	238	75	273	240	174	234	97	142	149	10029	4196	1692
Alistipes putredinis	1100	1182	1220	1224	877	787	1828	2067	2246	2273	1526	1064
Bacteroides helcogenes	1322	1405	1453	2024	1252	1524	1110	1126	1773	1311	1534	1276
Butyricicoccus pullicaecorum	1516	1783	2884	2440	1912	1573	940	503	919	738	673	745
Parabacteroides gordonii	1050	742	1505	2331	1590	1638	1203	1378	1783	954	1241	1195
Bacteroides plebeius	1300	724	1617	1659	1330	1689	749	954	1645	1188	1140	1783
Bacteroides stercoris	1760	1251	1415	2633	2342	926	708	778	991	699	1125	641
Bacteroides oleiciplenus	1159	782	1310	1899	1216	1650	1033	956	1644	1050	1070	1238
Roseburia inulinivorans	1298	1178	2400	1560	1542	1616	567	300	686	706	871	832
Adlercreutzia equolifaciens	93	158	744	113	96	73	4506	3581	1213	304	409	2260
Dorea sp. 5-2	940	1045	1391	1459	1056	1324	679	714	1312	792	1084	1400
Bacteroides neonati	760	548	1096	1954	1063	1322	774	1053	1404	1033	927	1114
Holdemania filiformis	1111	1289	1602	2572	2033	1826	275	274	482	337	421	426
[Ruminococcus] gnavus	1063	1088	1127	1516	1086	1351	632	567	1137	831	947	1258
Bacteroides sartorii	1130	424	1072	1928	1437	1067	1041	1077	1131	627	743	920
Citrobacter rodentium	1065	4169	457	3548	965	843	263	273	192	667	81	73
Subdoligranulum variabile	1036	1282	1472	1312	1087	1226	737	384	812	752	1150	1163
Alistipes ihumii	1818	439	910	1894	1603	1355	172	1615	818	784	304	601
Bacteroides eggerthii	1232	969	1231	1364	886	1286	726	759	1151	747	932	1007
Bacteroides barnesiae	886	1199	966	1386	821	1172	735	769	1085	958	1253	1021
Subdoligranulum sp. 4_3_54A2FAA	872	983	1586	1246	1033	1212	799	526	860	687	978	1100
Bacteroides reticulotermitis	684	470	1070	1287	851	1388	470	559	1444	1145	1000	1395
Parasutterella excrementihominis	323	227	1074	548	573	841	768	650	3604	955	489	1459
Dialister invisus	316	572	385	1500	419	512	1149	1093	2149	934	1081	1329
[Clostridium] methylpentosum	762	1051	1172	1537	1220	1036	663	348	972	610	960	1049
Oscillibacter sp. ER4	824	889	1438	1185	1044	987	946	518	767	890	961	926
Alistipes indistinctus	1013	435	965	1276	944	929	540	1398	1286	1033	911	580
Odoribacter splanchnicus	833	393	567	958	868	542	1560	2006	1241	713	708	749
Bacteroides salyersiae	791	669	769	1775	660	861	813	886	1127	717	889	828
Oscillibacter valericigenes	1003	989	1857	1548	1024	792	586	445	586	590	572	555
Lachnospiraceae bacterium A4	797	1069	913	838	759	1117	654	407	1006	813	1001	1164
Clostridium sp. 12(A)	941	738	1009	1097	1056	1261	482	504	864	798	633	915
Blautia wexlerae	797	1059	1021	1047	814	1320	461	381	682	603	883	1127
Clostridium sp. ASBs410	523	426	624	1123	627	786	1073	1287	1630	912	398	456
Anaerotruncus sp. G3(2012)	965	979	1655	1476	841	814	554	339	513	439	277	403
Bacteroides nordii	1075	475	1077	941	745	954	438	575	922	648	593	656
Eubacterium ramulus	832	613	1000	1307	817	1039	362	304	529	641	753	863
Bacteroides coprophilus	775	538	851	1008	575	771	645	810	1015	925	537	505
Eubacterium ventriosum	763	734	1008	1029	946	1067	395	310	540	517	674	810
Ruminococcus gauvreauii	710	641	947	1604	833	697	503	417	791	508	396	463
Lachnospiraceae bacterium A2	697	738	742	1464	662	844	407	280	731	468	662	750
Citrobacter youngae	1429	1004	662	841	1492	1155	356	449	289	441	127	94
Oscillibacter ruminantium	822	800	1575	1242	741	564	438	370	317	511	334	449
Barnesiella intestinihominis	357	270	722	1355	823	831	342	559	634	476	498	1153
Dialister micraerophilus	200	399	253	981	362	523	876	687	1452	638	765	869
Erysipelotrichaceae bacterium 3_1_53	441	758	578	578	494	782	1207	299	739	453	704	870
Eubacterium sp. AB3007	1183	230	2192	808	807	262	382	851	402	199	235	311
Acidaminococcus intestini	255	184	276	341	2995	2641	113	124	272	201	124	240
Bacteroides salanitronis	634	386	782	1320	667	855	365	438	573	522	650	501
Megasphaera massiliensis	65	686	70	724	2727	2404	158	136	162	72	94	135
Roseburia intestinalis	803	548	845	740	777	872	330	239	467	631	477	660
Clostridium sp. D5	750	527	1000	1083	664	819	309	290	572	341	397	449
Citrobacter koseri	1182	784	875	695	1227	947	306	322	239	371	106	109
Roseburia hominis	464	540	1064	1097	531	759	355	205	502	395	550	597
Coprobacillus cateniformis	479	650	1221	653	736	787	221	151	480	341	657	672
Anaerovorax odorimutans	737	453	1190	582	538	361	1032	577	570	586	129	244
Veillonella magna	35	137	71	154	234	227	2618	148	1377	1554	72	273
Blautia hydrogenotrophica	646	372	892	1283	567	497	333	443	444	446	382	528
Chlamydia suis	1202	594	1010	1122	1444	151	4	27	0	606	221	279
Megasphaera micronuciformis	52	97	59	148	123	93	2470	129	1544	1710	85	61
Enterobacteriaceae bacterium strain FGI 57	1187	780	492	537	1091	901	244	357	213	419	89	79
Eubacterium plexicaudatum	565	581	775	797	572	646	275	310	519	353	402	491
Edwardsiella hoshinae	952	540	488	513	1017	749	224	265	174	333	75	88
Burkholderiales bacterium 1_1_47	112	63	543	182	267	440	244	231	1880	396	133	683
Clostridiales bacterium NK3B98	454	462	1009	786	715	456	201	104	170	211	138	180
Eggerthella lenta	254	284	246	136	196	229	349	330	628	584	470	1064
Blautia hansenii	396	314	479	1001	475	417	224	90	317	380	203	340
Prevotella disiens	157	106	496	1028	674	553	200	399	238	263	202	129
Prevotella buccalis	177	104	278	1148	370	354	227	305	369	452	328	270
Enterococcus faecalis	1571	1018	600	104	67	60	424	34	202	41	59	74
Caldalkalibacillus thermarum	94	155	150	285	288	300	1093	149	650	660	139	167
Prevotella copri	104	37	100	270	138	126	162	230	214	1451	690	358
Candidatus Stoquefichus massiliensis	287	366	1143	412	640	344	59	60	44	51	101	158
Draconibacterium orientale	66	42	68	128	91	81	126	103	154	86	123	114

## Sheet: Table 1B
Supplementary Table 1B: Bacterial taxa with significant abundance difference in QC compared to control at day 21 obtained by shotgun metagenome sequencing.
Taxa	baseMean	log2FoldChange	lfcSE	stat	pvalue	padj	Phylum	Family
Acidaminococcus intestini	1084.41	2.86763	0.671166	4.2726	1.93e-05	0.000444375	Firmicutes	Acidaminococcaceae
Coprococcus comes	5416.87	1.40345	0.274927	5.10483	3.31e-07	1.65e-05	Firmicutes	Erysipelotrichaceae
Parabacteroides merdae	35625.1	1.36351	0.337167	4.04401	5.25e-05	0.000954391	Bacteroidetes	Tannerellaceae
Bacteroides dorei	1310.86	0.757043	0.21775	3.47667	0.000507681	0.00628743	Bacteroidetes	Bacteroidaceae
Alistipes sp. HGB5	2077.48	-0.665873	0.191208	-3.48244	0.00049686	0.00628743	Bacteroidetes	Rikenellaceae
Anaerotruncus colihominis	2631.21	-0.793145	0.182231	-4.35241	1.35e-05	0.000361303	Firmicutes	Ruminocococcaceae
Alistipes onderdonkii	228180	-0.82138	0.22433	-3.66148	0.000250758	0.00367019	Bacteroidetes	Rikenellaceae
Flavonifractor plautii	292501	-0.937768	0.201263	-4.65941	3.17e-06	0.00010211	Firmicutes	Ruminocococcaceae
Coprococcus catus	2061.49	-2.06646	0.561902	-3.67761	0.000235428	0.00367019	Firmicutes	Erysipelotrichaceae
Dorea longicatena	9033.01	-2.09052	0.412814	-5.06407	4.1e-07	1.65e-05	Firmicutes	Lachnospiraceae
Anaerostipes caccae	1567.75	-2.14184	0.355358	-6.02728	1.67e-09	1.34e-07	Firmicutes	Lachnospiraceae
Eubacterium limosum	3263.61	-2.83668	0.702073	-4.04044	5.34e-05	0.000954391	Firmicutes	Eubacteriaceae
Enterococcus faecalis	645.312	-4.157	0.451071	-9.21586	3.09e-20	4.97e-18	Firmicutes	Enterococcaceae

## Sheet: Table 1C
Supplementary Table 1C: Bacterial taxa with significant abundance difference in RB compared to control at day 21 obtained by shotgun metagenome sequencing.
Taxa	baseMean	log2FoldChange	lfcSE	stat	pvalue	padj	Phylum	Family
Veillonella parvula	103107	16.2458	1.14957	14.1321	2.41e-45	3.71e-43	Firmicutes	Veillonellaceae
Veillonella sp. oral taxon 158	8922.09	11.4218	1.25751	9.08293	1.06e-19	2.33e-18	Firmicutes	Veillonellaceae
Veillonella sp. AS16	5265.44	10.8113	1.10902	9.74846	1.87e-22	5.77e-21	Firmicutes	Veillonellaceae
Veillonella dispar	10699.8	9.20824	1.00264	9.18402	4.15e-20	1.07e-18	Firmicutes	Veillonellaceae
Veillonella atypica	3456.4	8.11335	1.12043	7.24131	4.44e-13	8.55e-12	Firmicutes	Veillonellaceae
Megasphaera micronuciformis	811.498	4.6112	0.852634	5.40819	6.37e-08	5.45e-07	Firmicutes	Veillonellaceae
Veillonella magna	831.031	4.40443	0.904139	4.87141	1.11e-06	6.7e-06	Firmicutes	Veillonellaceae
Adlercreutzia equolifaciens	2068.27	3.86233	0.833112	4.63603	3.55e-06	1.66e-05	Actinobacteria	Eggerthellaceae
Caldalkalibacillus thermarum	420.128	2.59707	0.682	3.80802	0.000140083	0.000501693	Firmicutes	Bacillaceae
Alistipes sp. HGB5	6809.24	2.49052	0.46381	5.36971	7.89e-08	6.39e-07	Bacteroidetes	Rikenellaceae
Alistipes finegoldii	8078.89	2.35679	0.45406	5.19049	2.1e-07	1.45e-06	Bacteroidetes	Rikenellaceae
[Clostridium] symbiosum	122958	2.20619	0.381061	5.7896	7.06e-09	6.79e-08	Firmicutes	Lachnospiraceae
Intestinimonas butyriciproducens	68699.2	2.19011	0.465075	4.70916	2.49e-06	1.37e-05	Firmicutes	Unclassified Clostridiales
Dialister micraerophilus	669.671	2.05008	0.366132	5.59929	2.15e-08	1.95e-07	Firmicutes	Veillonellaceae
Dialister invisus	976.733	2.01121	0.328057	6.13067	8.75e-10	9.63e-09	Firmicutes	Veillonellaceae
Bacteroides thetaiotaomicron	123429	1.96416	0.297682	6.59817	4.16e-11	5.83e-10	Bacteroidetes	Bacteroidaceae
Dialister succinatiphilus	1711.59	1.93947	0.414235	4.68204	2.84e-06	1.51e-05	Firmicutes	Veillonellaceae
Parasutterella excrementihominis	1021.11	1.85085	0.63143	2.93121	0.00337649	0.00753593	Proteobacteria	Sutterellaceae
Odoribacter splanchnicus	1216.81	1.82348	0.44812	4.06918	4.72e-05	0.000181637	Bacteroidetes	Odoribacteraceae
Prevotella copri	149.822	1.71003	0.460533	3.71314	0.0002047	0.00070053	Bacteroidetes	Prevotellaceae
Clostridium sp. ASBs410	969.331	1.66997	0.155094	10.7674	4.9e-27	2.52e-25	Firmicutes	Clostridiaceae
Draconibacterium orientale	96.9527	1.45099	0.310909	4.66692	3.06e-06	1.53e-05	Bacteroidetes	Prolixibacteraceae
Sutterella wadsworthensis	47216.5	1.34156	0.275444	4.87054	1.11e-06	6.7e-06	Proteobacteria	Sutterellaceae
Bacteroides faecichinchillae	3054.88	1.32487	0.375045	3.53255	0.000411565	0.00117372	Bacteroidetes	Bacteroidaceae
Bacteroides faecis	13220.3	1.26529	0.347164	3.64466	0.000267747	0.00084149	Bacteroidetes	Bacteroidaceae
Bacteroides dorei	1314.13	1.22925	0.264037	4.6556	3.23e-06	1.55e-05	Bacteroidetes	Bacteroidaceae
Parabacteroides distasonis	46806.8	1.17789	0.182416	6.45716	1.07e-10	1.37e-09	Bacteroidetes	Tannerellaceae
Alistipes putredinis	1681.64	1.14201	0.234632	4.86723	1.13e-06	6.7e-06	Bacteroidetes	Rikenellaceae
Bacteroides coprocola	9565	1.09182	0.350434	3.11563	0.00183553	0.00428289	Bacteroidetes	Bacteroidaceae
Prevotella buccalis	246.284	1.05706	0.332014	3.18378	0.00145366	0.00355339	Bacteroidetes	Prevotellaceae
Eggerthella lenta	352.428	0.984202	0.241465	4.07596	4.58e-05	0.000181637	Actinobacteria	Eggerthellaceae
Alistipes senegalensis	4859.63	0.940162	0.327446	2.87119	0.00408924	0.00899632	Bacteroidetes	Rikenellaceae
Alistipes timonensis	1591.86	0.925274	0.227125	4.07385	4.62e-05	0.000181637	Bacteroidetes	Rikenellaceae
Alistipes onderdonkii	334940	0.885972	0.224155	3.95249	7.73e-05	0.0002905	Bacteroidetes	Rikenellaceae
Alistipes shahii	7427.36	0.878955	0.254149	3.45843	0.000543339	0.00144266	Bacteroidetes	Rikenellaceae
Phascolarctobacterium sp. CAG:207	90662.6	0.849982	0.270749	3.13937	0.00169309	0.00401132	Firmicutes	Acidaminococcaceae
Bacteroides neonati	938.14	0.761974	0.216846	3.51389	0.00044159	0.00123645	Bacteroidetes	Bacteroidaceae
Parabacteroides gordonii	1283.7	0.757526	0.211367	3.58394	0.000338454	0.00100448	Bacteroidetes	Tannerellaceae
Bacteroides salyersiae	857.856	0.655831	0.18049	3.63361	0.000279483	0.000860808	Bacteroidetes	Bacteroidaceae
Eubacterium plexicaudatum	481.609	-0.509781	0.138844	-3.67162	0.000241015	0.000789707	Firmicutes	Eubacteriaceae
Blautia wexlerae	708.045	-0.638045	0.214516	-2.97435	0.00293614	0.0066495	Firmicutes	Lachnospiraceae
Clostridium sp. D5	539.628	-0.663251	0.202243	-3.27948	0.00104	0.00262557	Firmicutes	Clostridiaceae
Eubacterium ventriosum	596.678	-0.698196	0.147743	-4.72573	2.29e-06	1.31e-05	Firmicutes	Eubacteriaceae
Eubacterium ramulus	576.027	-0.720833	0.166681	-4.32464	1.53e-05	6.92e-05	Firmicutes	Eubacteriaceae
Roseburia intestinalis	511.729	-0.78429	0.218869	-3.58338	0.000339176	0.00100448	Firmicutes	Lachnospiraceae
Oscillibacter valericigenes	859.88	-0.863593	0.262619	-3.28839	0.00100761	0.00258621	Firmicutes	Oscillospiraceae
Anaerotruncus sp. G3(2012)	787.265	-0.979194	0.282508	-3.46608	0.000528115	0.00142684	Firmicutes	Ruminocococcaceae
Butyricicoccus pullicaecorum	1337.44	-1.02517	0.318776	-3.21595	0.00130014	0.00322937	Firmicutes	Clostridiaceae
Oscillibacter ruminantium	679.188	-1.06518	0.35654	-2.98755	0.00281227	0.00646403	Firmicutes	Oscillospiraceae
Firmicutes bacterium ASF500	1924.61	-1.16481	0.307584	-3.78696	0.000152502	0.000533757	Firmicutes	Unclassified Firmicutes
Coprobacillus cateniformis	482.691	-1.19487	0.377478	-3.16541	0.00154867	0.00372649	Firmicutes	Erysipelotrichaceae
Pseudoflavonifractor capillosus	5547.22	-1.25983	0.344394	-3.6581	0.000254095	0.000815221	Firmicutes	Ruminocococcaceae
Roseburia inulinivorans	983.055	-1.30708	0.305202	-4.28267	1.85e-05	8.13e-05	Firmicutes	Lachnospiraceae
Citrobacter koseri	597.274	-1.3335	0.381788	-3.49277	0.000478036	0.0013146	Proteobacteria	Enterobacteriaceae
[Clostridium] scindens	18190.4	-1.51373	0.371969	-4.0695	4.71e-05	0.000181637	Firmicutes	Lachnospiraceae
Clostridiales bacterium NK3B98	364.06	-1.61253	0.392286	-4.1106	3.95e-05	0.000168816	Firmicutes	Unclassified Clostridiales
Holdemania filiformis	776.804	-1.66914	0.146784	-11.3714	5.81e-30	4.47e-28	Firmicutes	Erysipelotrichaceae
Oscillibacter sp. 1-3	2453.23	-1.82869	0.304187	-6.01174	1.84e-09	1.88e-08	Firmicutes	Oscillospiraceae
Dorea formicigenerans	2396.79	-1.86821	0.400392	-4.66596	3.07e-06	1.53e-05	Firmicutes	Lachnospiraceae
Anaerotruncus colihominis	1691.16	-1.95783	0.276389	-7.08362	1.4e-12	2.4e-11	Firmicutes	Ruminocococcaceae
Clostridium sp. ATCC 29733	2919.7	-2.08077	0.401334	-5.18463	2.16e-07	1.45e-06	Firmicutes	Clostridiaceae
Coprococcus comes	1469.33	-2.14951	0.21254	-10.1134	4.82e-24	1.85e-22	Firmicutes	Erysipelotrichaceae
Bacteroides xylanisolvens	20853.9	-2.32609	0.650846	-3.57395	0.00035163	0.00102172	Bacteroidetes	Bacteroidaceae
Coprococcus catus	1604.7	-2.33039	0.628732	-3.70649	0.000210153	0.000703557	Firmicutes	Erysipelotrichaceae
Citrobacter rodentium	1075.18	-2.70083	0.811476	-3.32829	0.000873802	0.00228077	Proteobacteria	Enterobacteriaceae
Flavonifractor plautii	178360	-2.72186	0.390129	-6.97684	3.02e-12	4.65e-11	Firmicutes	Ruminocococcaceae
Candidatus Stoquefichus massiliensis	279.996	-2.9613	0.553274	-5.35231	8.68e-08	6.69e-07	Firmicutes	Erysipelotrichaceae
Oscillibacter sp. KLE 1728	8949.77	-3.00315	0.567763	-5.28944	1.23e-07	9e-07	Firmicutes	Oscillospiraceae
Clostridiales bacterium VE202-08	1640.82	-3.91187	0.636323	-6.14761	7.87e-10	9.32e-09	Firmicutes	Unclassified Clostridiales
Chlamydia suis	421.679	-5.94661	1.53835	-3.86559	0.000110823	0.00040635	Chlamydiae	Chlamydiaceae

## Sheet: Table 1D
Supplementary Table 1D: Bacterial taxa with significant abundance difference in QC+RB compared to control at day 21 obtained by shotgun metagenome sequencing.
Taxa	baseMean	log2FoldChange	lfcSE	stat	pvalue	padj	Phylum	Family
Veillonella parvula	49728.5	15.0937	1.71397	8.8063	1.29e-18	6.77e-17	Firmicutes	Veillonellaceae
Veillonella sp. oral taxon 158	4370.56	10.2688	1.76666	5.81253	6.15e-09	5.37e-08	Firmicutes	Veillonellaceae
Veillonella sp. AS16	2493.16	9.63965	1.56506	6.15928	7.31e-10	6.94e-09	Firmicutes	Veillonellaceae
Desulfovibrio piger	29355.7	8.86928	0.511825	17.3287	2.86e-67	4.48e-65	Proteobacteria	Desulfovibrionaceae
Veillonella dispar	5327.15	8.10757	1.17908	6.87621	6.15e-12	7.42e-11	Firmicutes	Veillonellaceae
Veillonella atypica	1649.09	6.91154	1.70728	4.04827	5.16e-05	0.000238263	Firmicutes	Veillonellaceae
Prevotella stercorea	2941.47	5.01489	0.694433	7.22156	5.14e-13	6.72e-12	Bacteroidetes	Prevotellaceae
Anaerostipes hadrus	3500.72	4.91266	0.998804	4.91854	8.72e-07	6.52e-06	Firmicutes	Lachnospiraceae
Prevotella copri	483.469	3.59757	0.584503	6.15491	7.51e-10	6.94e-09	Bacteroidetes	Prevotellaceae
Veillonella magna	379.465	3.06747	0.991696	3.09315	0.00198041	0.0063454	Firmicutes	Veillonellaceae
Intestinimonas butyriciproducens	81323.9	2.37574	0.316321	7.51055	5.89e-14	1.16e-12	Firmicutes	Unclassified Clostridiales
Alistipes sp. HGB5	6018.09	2.16858	0.266644	8.13284	4.19e-16	9.41e-15	Bacteroidetes	Rikenellaceae
Alistipes finegoldii	7138.28	2.02871	0.279108	7.26852	3.63e-13	5.19e-12	Bacteroidetes	Rikenellaceae
Alistipes senegalensis	7087.48	1.58441	0.504532	3.14036	0.00168739	0.00563662	Bacteroidetes	Rikenellaceae
Eggerthella lenta	493.521	1.54015	0.374187	4.11597	3.86e-05	0.000183428	Actinobacteria	Eggerthellaceae
Dialister micraerophilus	538.022	1.51068	0.388977	3.88371	0.000102875	0.000425035	Firmicutes	Veillonellaceae
Dialister invisus	793.418	1.49214	0.34147	4.36976	1.24e-05	7.23e-05	Firmicutes	Veillonellaceae
Dialister succinatiphilus	1427.42	1.46177	0.395507	3.69594	0.000219077	0.000859876	Firmicutes	Veillonellaceae
Bacteroides thetaiotaomicron	95376.1	1.37106	0.322807	4.2473	2.16e-05	0.000113587	Bacteroidetes	Bacteroidaceae
Bacteroides faecis	13895	1.25499	0.350434	3.58124	0.000341965	0.0012783	Bacteroidetes	Bacteroidaceae
Sutterella wadsworthensis	44526.6	1.10684	0.260728	4.24518	2.18e-05	0.000113587	Proteobacteria	Sutterellaceae
Bacteroides dorei	1228.4	0.965911	0.22823	4.23218	2.31e-05	0.000113587	Bacteroidetes	Bacteroidaceae
Bacteroides reticulotermitis	957.229	0.873735	0.222334	3.92984	8.5e-05	0.000370711	Bacteroidetes	Bacteroidaceae
Bacteroides neonati	907.571	0.549691	0.17566	3.12929	0.00175227	0.00573137	Bacteroidetes	Bacteroidaceae
Ruminococcus gauvreauii	598.491	-0.575624	0.174506	-3.29859	0.000971706	0.00331648	Firmicutes	Ruminocococcaceae
Coprococcus comes	2066.46	-0.675664	0.222358	-3.03863	0.00237657	0.00746242	Firmicutes	Erysipelotrichaceae
Clostridium sp. D5	558.269	-0.75206	0.204736	-3.67332	0.000239423	0.000916814	Firmicutes	Clostridiaceae
Roseburia inulinivorans	1165.41	-0.809733	0.213654	-3.78993	0.000150689	0.000606618	Firmicutes	Lachnospiraceae
Parabacteroides johnsonii	3027	-0.925145	0.263864	-3.50614	0.00045465	0.00166	Bacteroidetes	Tannerellaceae
Oscillibacter valericigenes	890.691	-0.961419	0.200044	-4.80603	1.54e-06	1.05e-05	Firmicutes	Oscillospiraceae
Oscillibacter ruminantium	714.359	-1.09995	0.259905	-4.2321	2.32e-05	0.000113587	Firmicutes	Oscillospiraceae
Hungatella hathewayi	14686.3	-1.26134	0.287961	-4.38026	1.19e-05	7.16e-05	Firmicutes	Clostridiaceae
Butyricicoccus pullicaecorum	1331.94	-1.331	0.20155	-6.60384	4.01e-11	4.49e-10	Firmicutes	Clostridiaceae
Pseudoflavonifractor capillosus	5752.78	-1.37484	0.304269	-4.51849	6.23e-06	3.91e-05	Firmicutes	Ruminocococcaceae
Anaerotruncus sp. G3(2012)	750.594	-1.49736	0.239888	-6.24189	4.32e-10	4.52e-09	Firmicutes	Ruminocococcaceae
Holdemania filiformis	837.183	-1.59763	0.186549	-8.56418	1.09e-17	2.85e-16	Firmicutes	Erysipelotrichaceae
Clostridiales bacterium NK3B98	383.647	-1.6452	0.341805	-4.81326	1.48e-06	1.05e-05	Firmicutes	Unclassified Clostridiales
Clostridium sp. ATCC 29733	3230.43	-1.74278	0.408961	-4.26149	2.03e-05	0.000113587	Firmicutes	Clostridiaceae
Eubacterium sp. AB3007	649.276	-1.99645	0.581739	-3.43187	0.000599433	0.00213888	Firmicutes	Eubacteriaceae
Oscillibacter sp. 1-3	2541.8	-1.99864	0.267694	-7.46616	8.26e-14	1.3e-12	Firmicutes	Oscillospiraceae
Escherichia albertii	2586.16	-2.01248	0.676786	-2.97359	0.00294342	0.00888685	Proteobacteria	Enterobacteriaceae
Anaerotruncus colihominis	1781.77	-2.02396	0.198934	-10.174	2.59e-24	2.03e-22	Firmicutes	Ruminocococcaceae
Escherichia coli	195106	-2.06727	0.699252	-2.9564	0.00311253	0.00922014	Proteobacteria	Enterobacteriaceae
Escherichia sp. TW09308	5505.66	-2.07675	0.694878	-2.98865	0.00280214	0.00862618	Proteobacteria	Enterobacteriaceae
Citrobacter youngae	625.549	-2.10075	0.631177	-3.32831	0.00087376	0.00304845	Proteobacteria	Enterobacteriaceae
Citrobacter koseri	557.35	-2.11908	0.545392	-3.88542	0.000102153	0.000425035	Proteobacteria	Enterobacteriaceae
Candidatus Stoquefichus massiliensis	316.29	-2.28885	0.579925	-3.94681	7.92e-05	0.000355267	Firmicutes	Erysipelotrichaceae
Blautia producta	22821.9	-2.58741	0.511837	-5.05514	4.3e-07	3.38e-06	Firmicutes	Lachnospiraceae
Oscillibacter sp. KLE 1728	9640.37	-2.77753	0.500883	-5.54527	2.94e-08	2.43e-07	Firmicutes	Oscillospiraceae
Bacteroides xylanisolvens	20751.1	-2.8373	0.602309	-4.7107	2.47e-06	1.61e-05	Bacteroidetes	Bacteroidaceae
Flavonifractor plautii	180984	-3.35442	0.386715	-8.67414	4.17e-18	1.37e-16	Firmicutes	Ruminocococcaceae
Enterococcus faecalis	555.586	-4.11058	0.474179	-8.66885	4.37e-18	1.37e-16	Firmicutes	Enterococcaceae
Eubacterium limosum	2505.88	-4.76385	0.63684	-7.48045	7.41e-14	1.29e-12	Firmicutes	Eubacteriaceae
